# Supplementary material for: Bioelectrochemical Treatment Technology—The New Practical Approach for Wastewater Management and GHG Emissions Reduction
Source: Frontiers journal article supplement (doi:10.3389/fceng.2022.832505), 2022-05-17
Supplement: Data_Sheet_1.docx [file Data_Sheet_1.docx]

**Supporting Information**

BioElectrochemical Treatment Technology (BETT) – the new practical approach for wastewater management and GHG emissions reduction

Sofia Babanova1,*, Jason Jones1, Kelly Wiseman1, Jaime Soles1, Jaime Garcia2, Pedro Huerta2, Daniel Barocio2, Ryoji Naito2, Orlando Arreola2, Gerardo Garcia2 and Orianna Bretschger1

1 Aquacycl LLC, 2180 Chablis Court, Suite 102, Escondido, CA 92029

2 D4C Product Development, 4683 Mercury St suite c, San Diego, CA 92111

Email: [sbabanova@aquacycl.com](mailto:sbabanova@aquacycl.com)

## I. Figures

Figure S1: Schematical representation of BETT reactor components and design


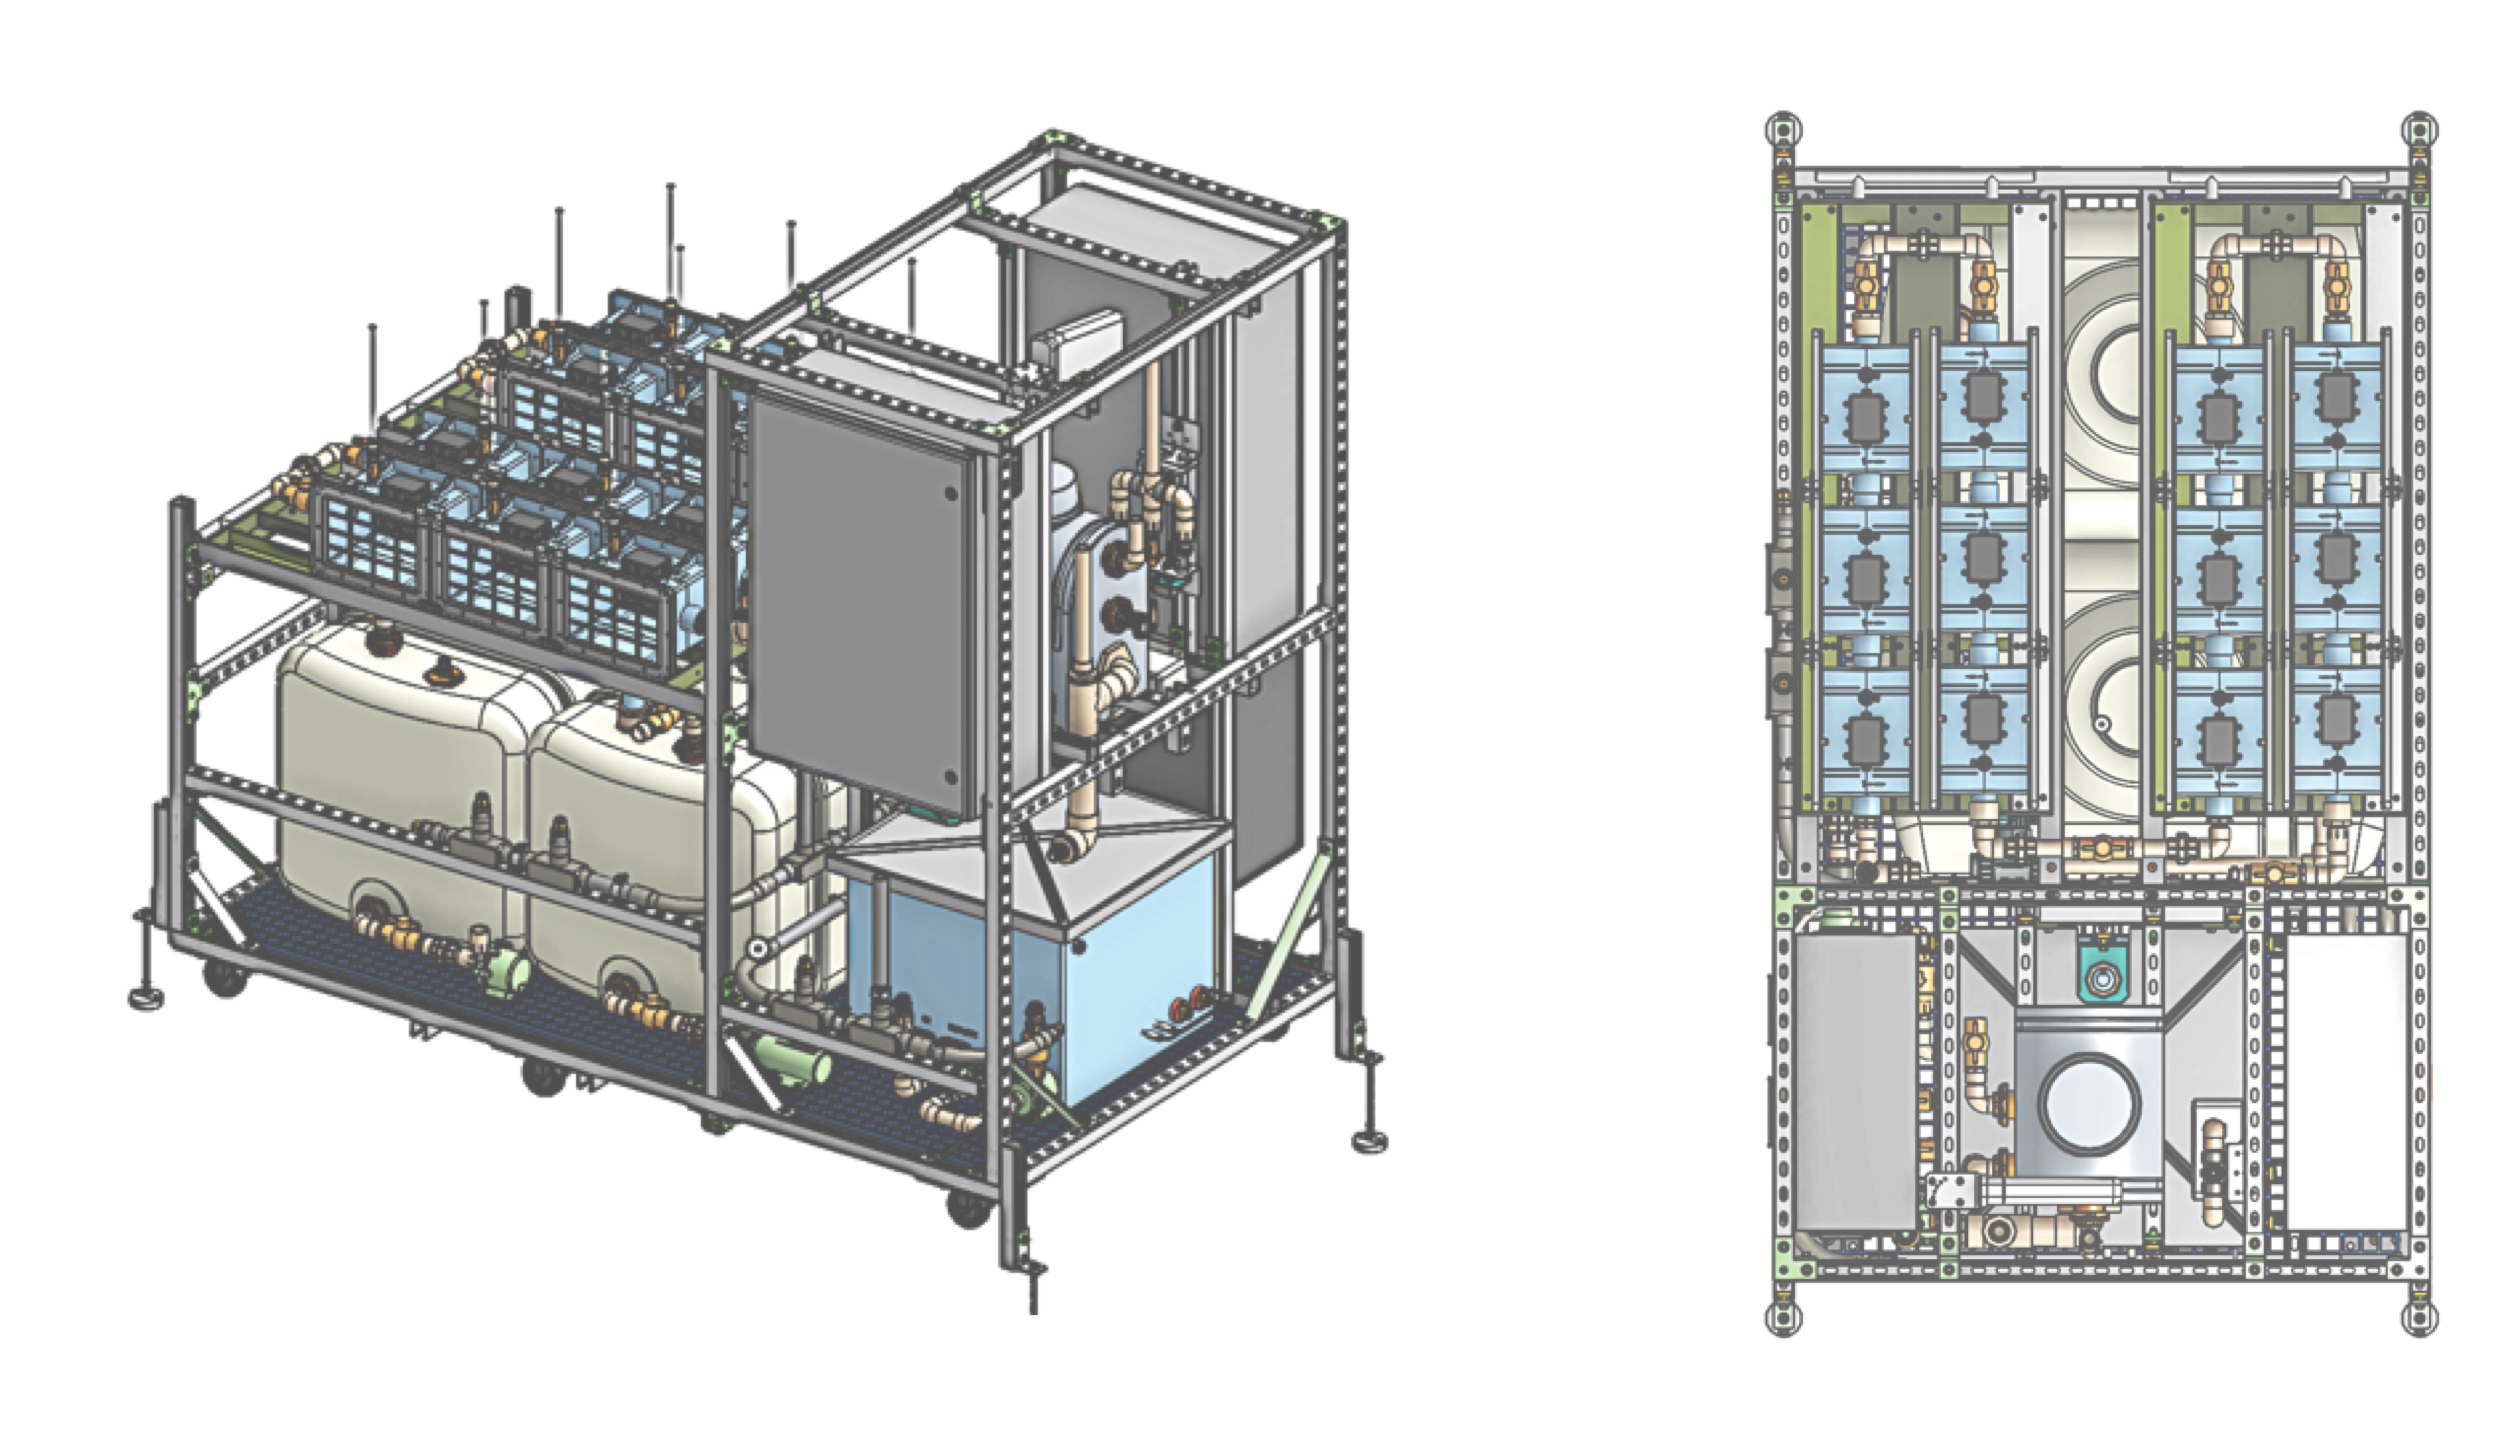


Figure S2: Rendering of the Demo Unit: (A) side view and (B) top view

Figure S3: Protein concentration of BETT system during batch mode

Figure S4: Average OCPs of the anode, left and right cathodes during batch mode (until Day 35) and continuous mode (Day 35 to Day 86)

Figure S5: Voltage generated form each BETT reactor separately during batch mode (until Day 35) and continuous mode (Day 35 to Day 86)

## II. Chemical analyses and calculations

COD removal was calculated using Eq.1:

(Eq. 1)

and COD removal efficiency (%) was calculated using Eq. 2:

x 100 (Eq. 2)

The Conversion efficiency (CE) of COD to VFAs was calculated as a ratio between COD removed and VFA produced in percentage (Eq. 3):

(Eq. 3)

Where the VFA concertation was converted into COD based on the mass balance for acetate and Eq. 4.

CH3COOH + 3O2 → 2CO2 + 2H2O

(Eq. 4)

with Cacetate being the amount of acetate produced in mg.L-1; Macetate is the molecular weight of acetate (60 g.mol-1) and MO2 is the molecular weight of oxygen.

Thus 1000 mg.L-1 of acetate estimated using TNTplus®—Method 10240 (Hach) corresponds to 1600 mg/L of COD.

## III. GHG emissions calculations

Landfill methane emissions were calculated using Eq. 5

(Eq.5)

Where EF = 0.25 kg-CH4 per kg-COD (https://www3.epa.gov/ttn/chief/conference/ei12/green/present/scheele.pdf)

The CO2 and CH4 emissions due to a biological activity were calculated as follows (https://www3.epa.gov/ttnchie1/efpac/ghg/GHG_Biogenic_Report_draft_Dec1410.pdf):

(Eq. 6)

(Eq.7)

Where:

CO2 = CO2 emission rate (mgCO2.h-1)

CH4 = CH4 emission rate (mgCH4.h-1)

10-6 = unit conversion factor (mg/g)

QWW = wastewater influent flow rate (m3.h-1) (0.03 m3.h-1)

OD = oxygen demand of influent wastewater to the biological treatment unit determined as either BOD5 or COD (mg.L-1 = g.m-3) (COD = 24,800 mg.L-1)

EffOD = oxygen demand removal efficiency of the biological treatment unit. Assumed as 0.95 for AS, AD and BETT

CFCO2 = conversion factor for maximum CO2 generation per unit of oxygen demand = 1.375 g-CO2/g oxygen demand

CFCH4 = conversion factor for maximum CH4 generation per unit of oxygen demand = 0.5 g-CH4/g oxygen demand

MCFWW = methane correction factor for wastewater treatment unit, indicating the fraction of the influent oxygen demand that is converted anaerobically in the wastewater treatment unit. MCFWW (AS) = 0.3; MCFWW (AD) = 0.8; MCFWW (BETT) = 0.95

BGCH4 = Fraction of carbon as CH4 in generated biogas (default is 0.65)

λ = Biomass yield (g C converted to biomass/g C consumed in the wastewater treatment process)

λ (AS) = 0.45; λ(AD) = 0.1; λ(BETT) = 0.05

The CO2 emissions form electricity consumption were calculated by:

(Eq. 8)

Where:

EE = Electricity Emission Factor State of California was 0.331 kg-CO2e per kWh and

Electricity Emission Factor for BETT was 0.294 kg-CO2e per kWh
